# Supplementary material for: Hydrogen-gas sensors based on graphene functionalized palladium nanoparticles: impedance response as a valuable sensor
Source: Royal Society of Chemistry journal article supplement (doi:10.1039/c5nj01673h), 2015-01-01
Supplement: c5nj01673h1.pdf [file c5nj01673h1.pdf]

## Supporting Information for New Journal of Chemistry

### Hydrogen-gas sensors based on graphene functionalized palladium nanoparticles: the impedance response as a valuable sensor evaluation

Reinaldo David Martínez-Orozco,<sup>\*a</sup> René Antaño-López<sup>b</sup> and Vicente Rodríguez-González<sup>a</sup>

<sup>a</sup>*División de Materiales Avanzados, Instituto Potosino de Investigación Científica y Tecnológica, Camino a la Presa San José 2055 Col. Lomas 4a. sección C.P. 78216, San Luis Potosí, S.L.P., México.*

<sup>b</sup>*Centro de Investigación y Desarrollo Tecnológico en Electroquímica, S.C., Pedro Escobedo, Querétaro, México.*

\*Corresponding author. Tel.: +52 4448342000

E-mail address: reinaldo.martinez@ipicyt.edu.mx (R. David Martínez-Orozco).

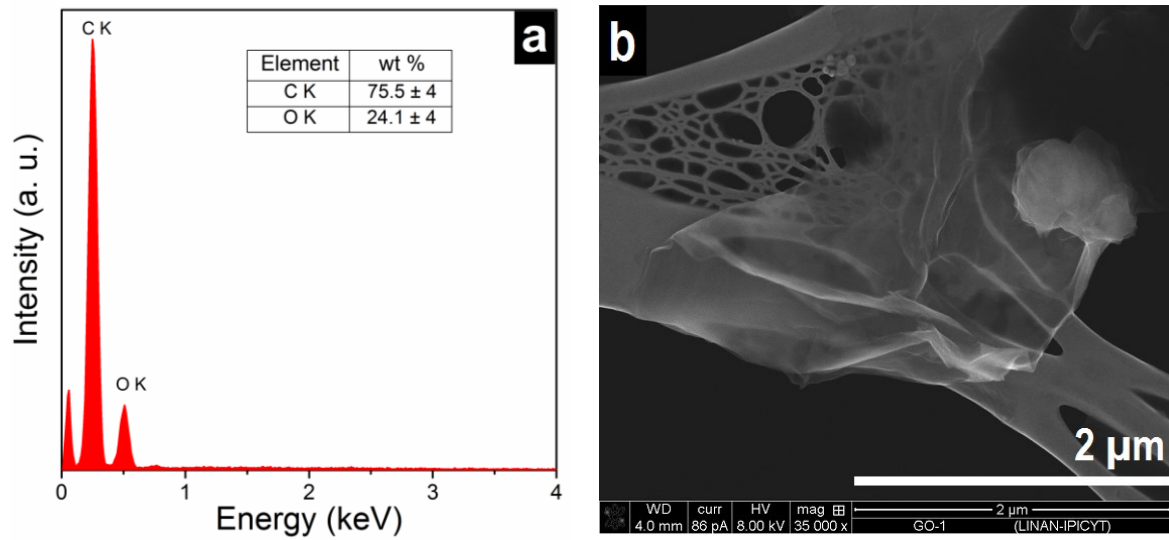

**Fig. S1** (a) EDX spectra of dried graphene oxide synthesized by modified Hummers method and (b) the corresponding SEM image.

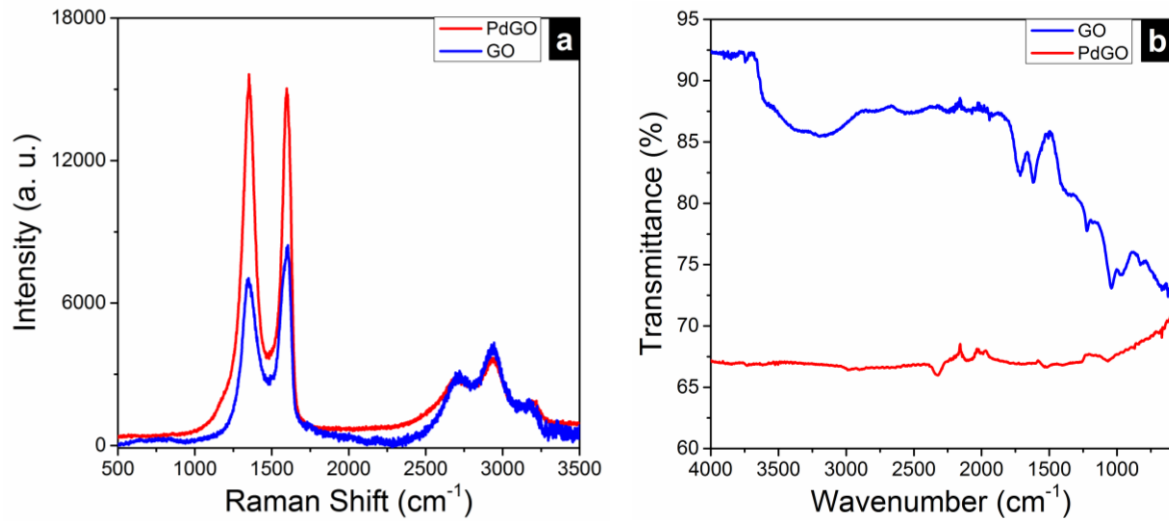

**Fig. S2.** (a) Raman spectra of dried PdGO compared with GO. (b) FTIR spectra of dried PdGO, compared with GO, which indicates removal of functional groups.

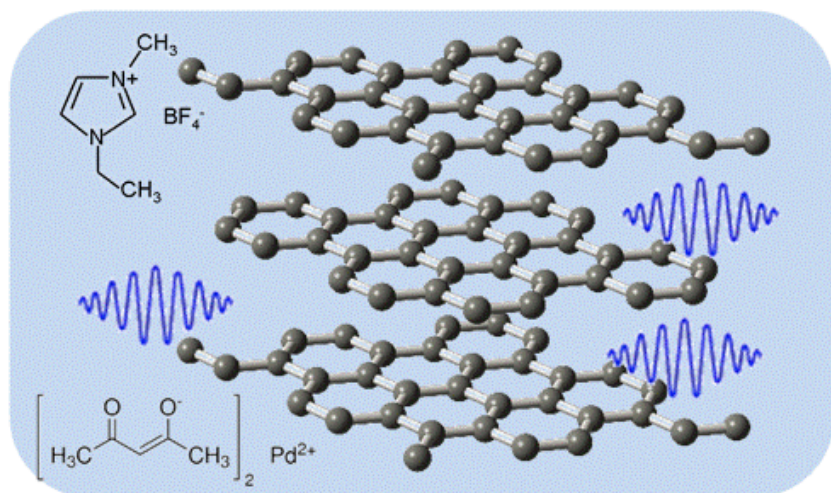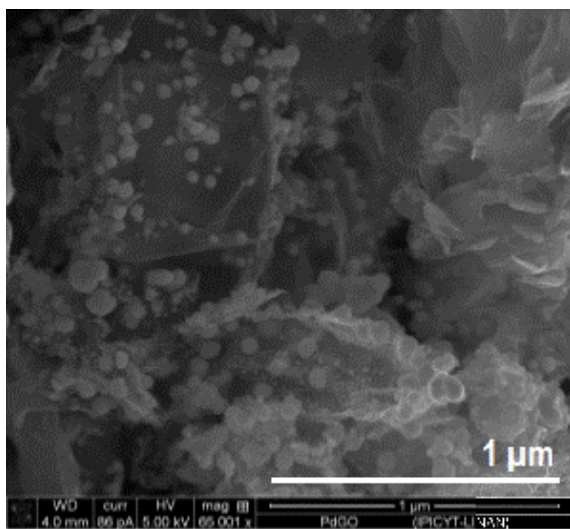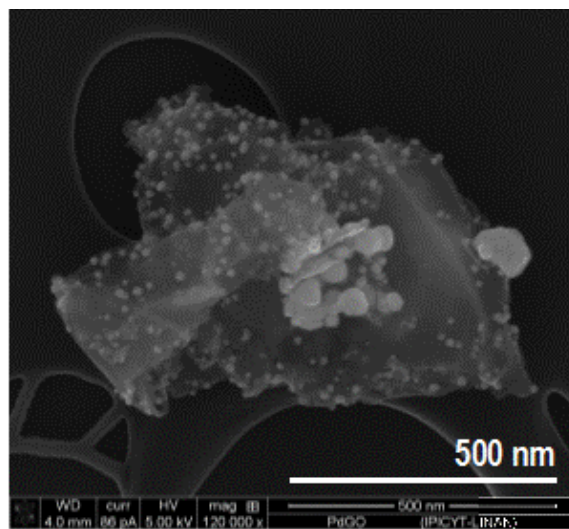

**Fig. S3** Schematic representation of hydrothermal-microwave exfoliation method to produce PdGO sample.

**Table S1.** Mixture conditions of the used gas and equivalent hydrogen concentrations in ppm and vol. %.

| 100 sccm = 100mL/min |                         | Hydrogen concentration |       |
|----------------------|-------------------------|------------------------|-------|
| $V_a$ = air volume   | $V_g$ = hydrogen volume | Volume (%)             | ppm   |
| 95 mL/min            | 5 mL/min                | 5%                     | 50000 |
| 97 mL/min            | 3 mL/min                | 3%                     | 30000 |
| 99 mL/min            | 1 mL/min                | 1%                     | 10000 |
| 99.5 mL/min          | 0.5 mL/min              | 0.5%                   | 5000  |
| 99.9 mL/min          | 0.1 mL/min              | 0.1%                   | 1000  |
| 99.99 mL/min         | 0.01 mL/min             | 0.01 %                 | 100   |

Hydrogen concentrations were determinate by the next equation:

$$\frac{V_g}{V_a + V_g} = \frac{V_g}{V_T}$$

where  $V_g$  = *gas volume*,  $V_a$  = *air volume*, and  $V_T$  = *total volume*

The setup contains gas cylinders and regulators, flow controller, test chamber and analyzer system. The gas flow rate was controlled by the flow controller valve and mass flow controller (Aalborg) and the flow rate was checked flow rate with a universal gas flowmeter (Agilent Technologies ADM1000). A check valve was set up at the outlet line to maintain the outflow of the gases near atmospheric pressure, where the exhaust gas was bubbled in water.

Hydrogen concentration was controlled by its amount in the mixture with synthetic air. Compressed air (UN 1002) and hydrogen gas (Chromatographic grade, UN 1049, 99.998% MIN.) were purchased from INFRA México. All tests were performed under the following atmospheric conditions: temperature:  $24^\circ \pm 2^\circ\text{C}$ , pressure:  $1.0 \pm 0.05$  bar, gas flow rate:  $100 \pm 2\%$  sccm and relative humidity:  $50\% \pm 10\%$ .

**Fig. S4** Detection with longer time for of six different H<sub>2</sub> concentrations with the PdGO sensor at room temperature.

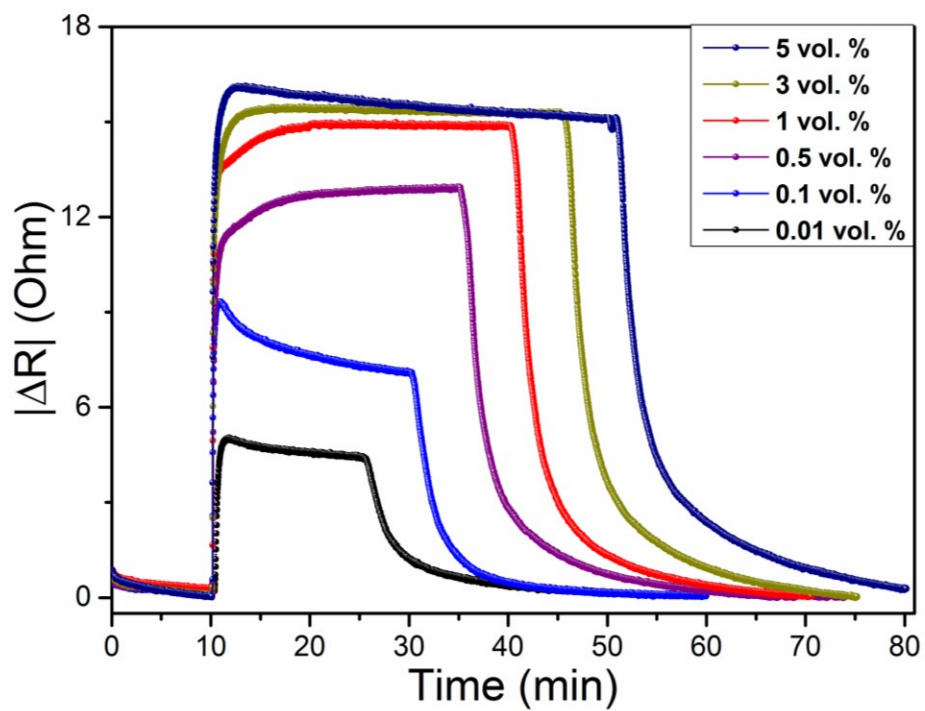

**Fig. S5.** Raw data tests of hydrogen detection from 0.1 to 5 vol. % in air for six cycles.

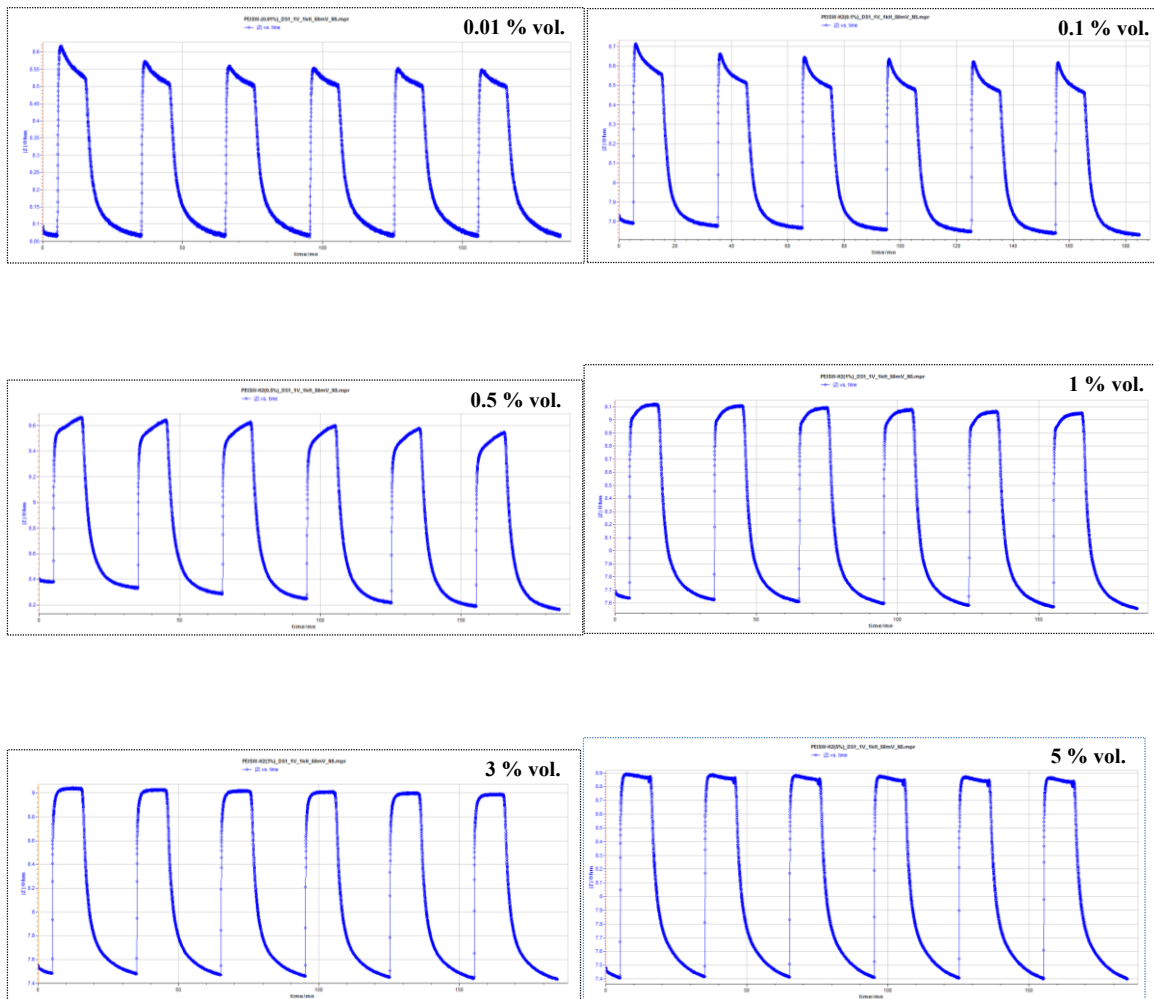

**Figure S6.** Reproducibility with another sensor fabricate with the same procedure for six different  $H_2$  concentrations.

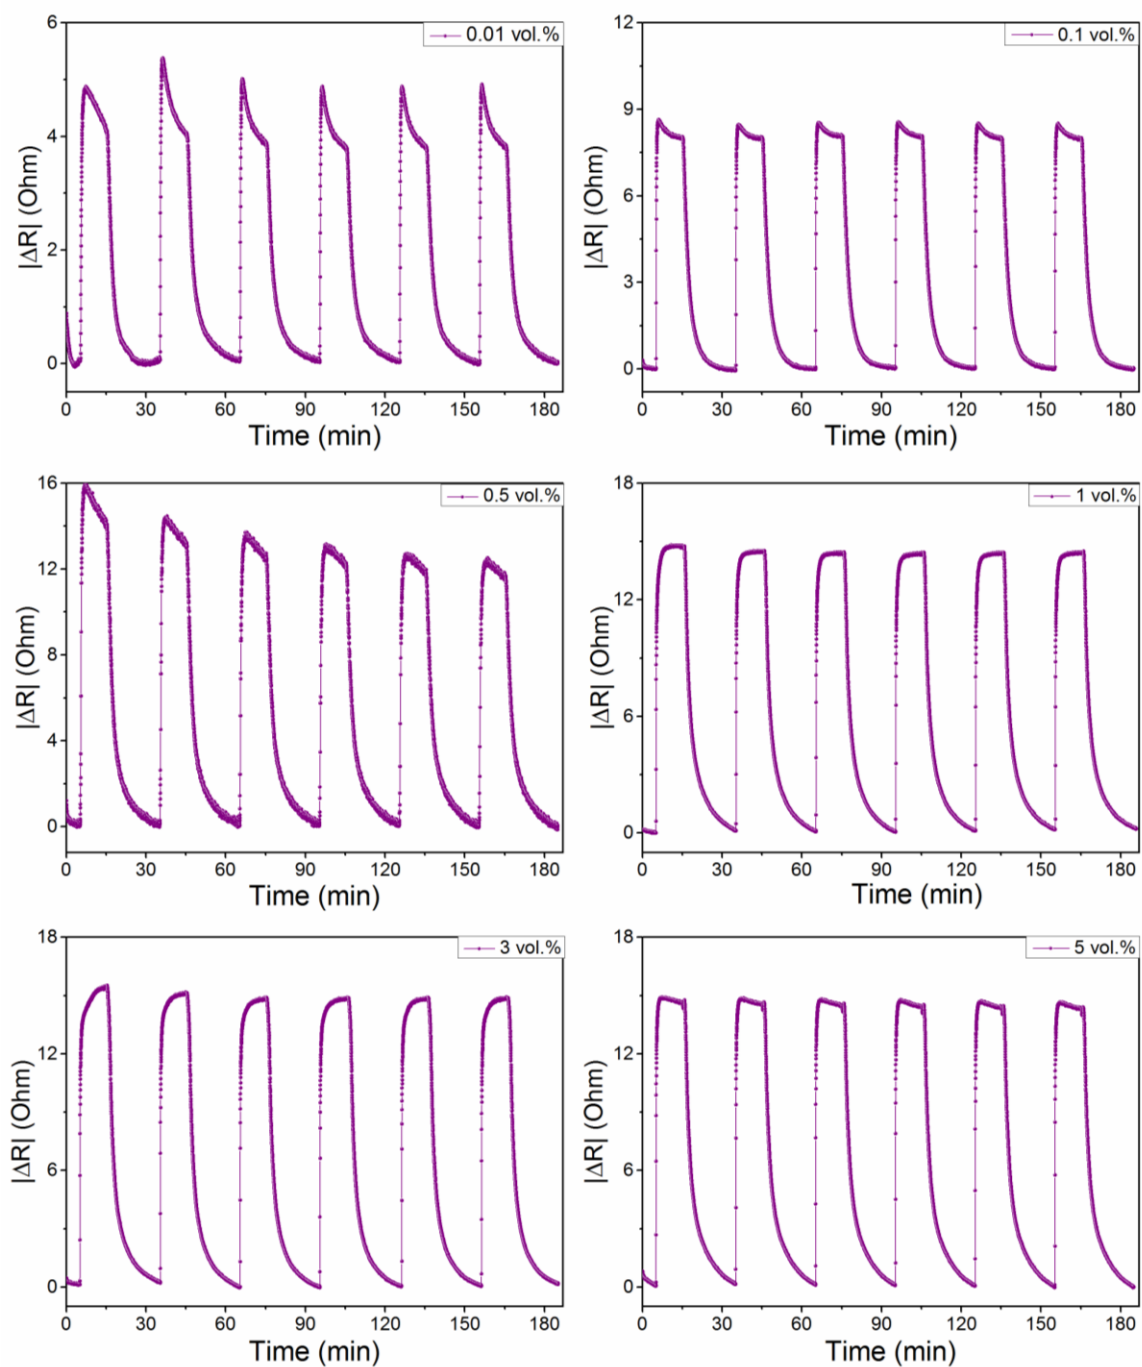

**Table S2:** Results of reproducibility by comparison two sensor with the corresponding sensitivity values.

| H <sub>2</sub> -concentration |       | Sensitivity (%) |                 |
|-------------------------------|-------|-----------------|-----------------|
| Volume (%)                    | ppm   | Device sensor 1 | Device sensor 2 |
| 0.01 %                        | 100   | 4.4 ± 0.2       | 4.1 ± 0.7       |
| 0.1%                          | 1000  | 7.7 ± 0.4       | 8.0 ± 2.0       |
| 0.5%                          | 5000  | 12.8 ± 0.7      | 13.4 ± 2.0      |
| 1%                            | 10000 | 14.7 ± 0.8      | 14.6 ± 0.5      |
| 3%                            | 30000 | 15.5 ± 0.9      | 14.7 ± 0.4      |
| 5%                            | 50000 | 15.9 ± 0.6      | 14.7 ± 0.5      |
